# Supplementary material
Source: Springer Nature journal article supplement (https://www.springermedizin.de/resource/supplementary/12865_2001_15_MOESM8_ESM.pdf/9428352)

Figure 6

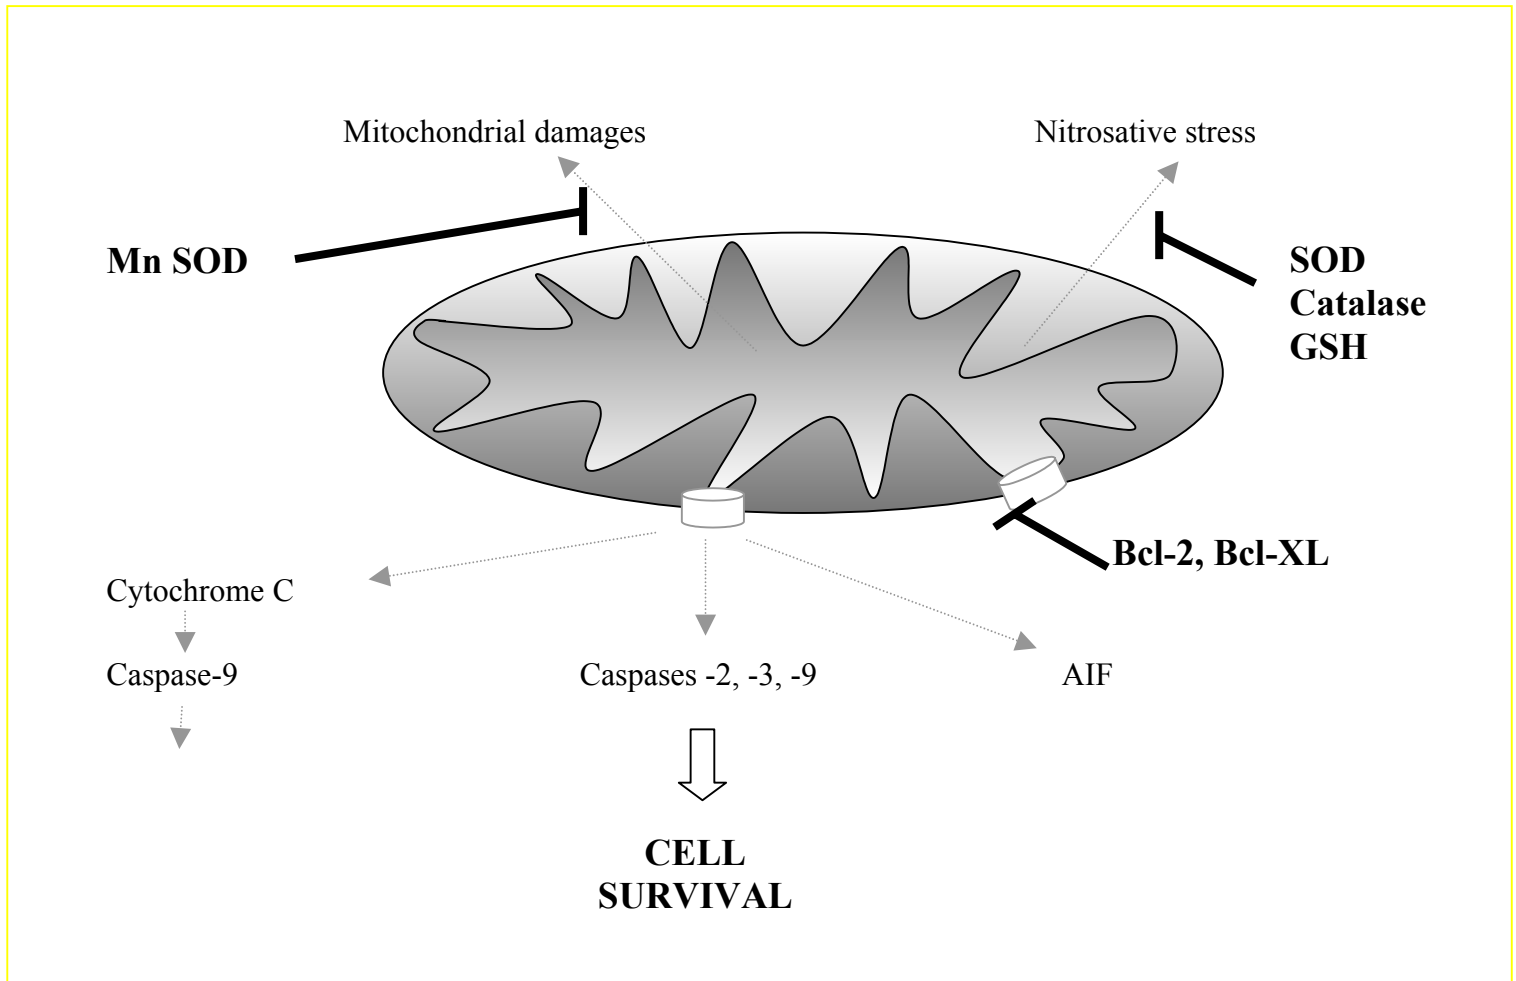

Supplement: MOESM8 [file 9428352]
